# Supplementary material for: Calix[4]arene-diphosphite rhodium complexes in solvent-free hydroaminovinylation of olefins
Source: Royal Society of Chemistry journal article supplement (doi:10.1039/c0gc00098a), 2010-01-01

## **Calix[4]arene-diphosphite rhodium complexes in *solvent-free* hydroaminovinylation of olefins**

**Laure Monnereau, David Sémeril,\* and Dominique Matt\***

Laboratoire de Chimie Inorganique Moléculaire et Catalyse, UMR 7177 CNRS, Université de Strasbourg, 1 rue Blaise Pascal, F-67008 Strasbourg Cedex, France  
email: dmatt@chimie.u-strasbg.fr, dsemeril@chimie.u-strasbg.fr

### **Typical chromatograms obtained after hydroformylation and hydroaminovinylation experiments**

Olefins used: styrene, 1-octene

Amines used: piperidine, dibutylamine, benzylamine

### Hydroformylation of 1-octene

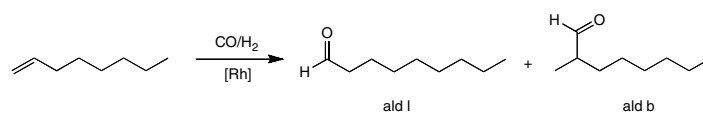

QuickTime™ et un  
decompressé  
sont requis pour visionner cette image.

### Hydroaminovinylation of 1-octene and piperidine

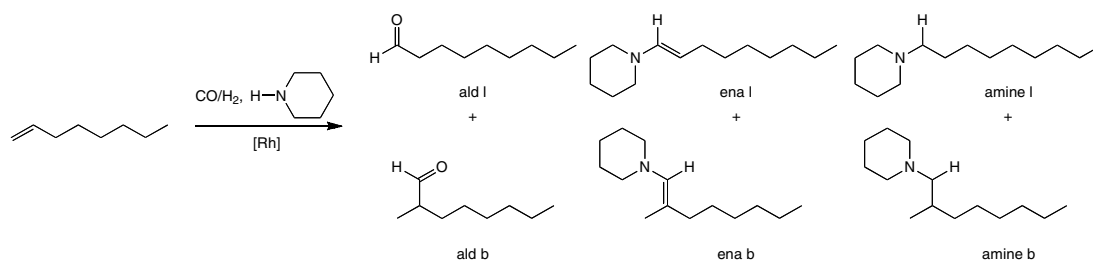

### Hydroaminovinylation of 1-octene and dibutylamine

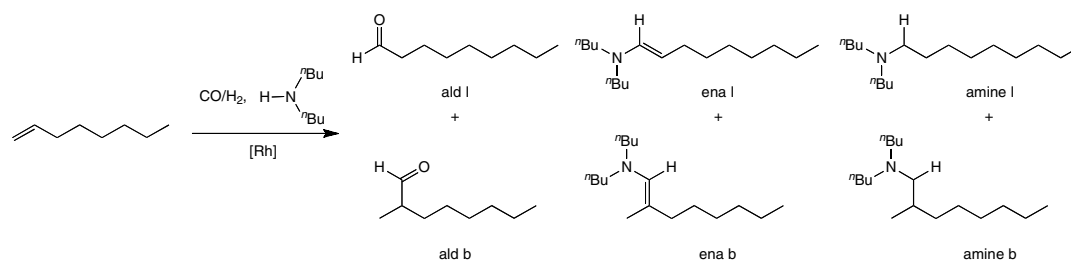

### Formation of imines starting from 1-octene

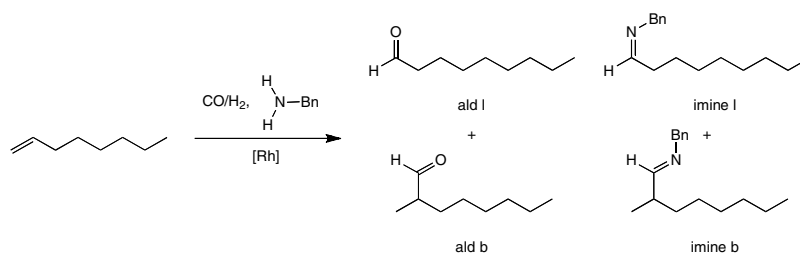

### Hydroformylation of styrene

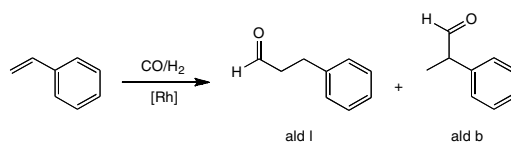

QuickTime™ et un  
décompressé  
sont requis pour visualiser cette image.

### Hydroaminovinylation of styrene and piperidine

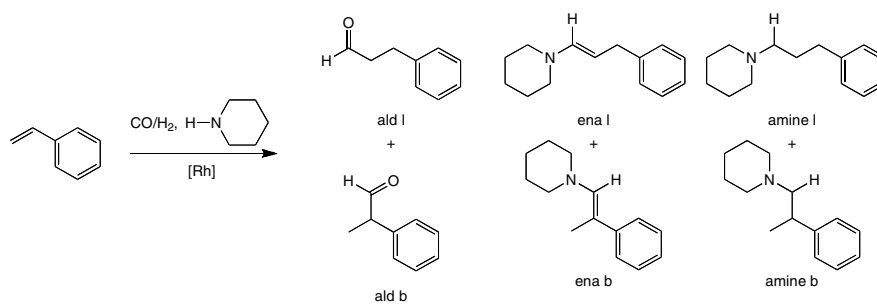

### Hydroaminovinylation of styrene and dibutylamine

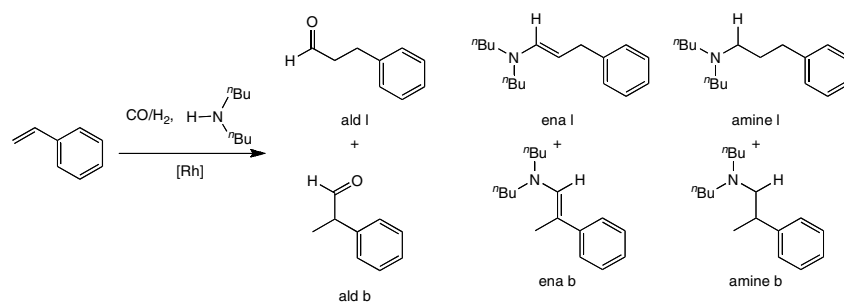



### Formation of imines starting from styrene

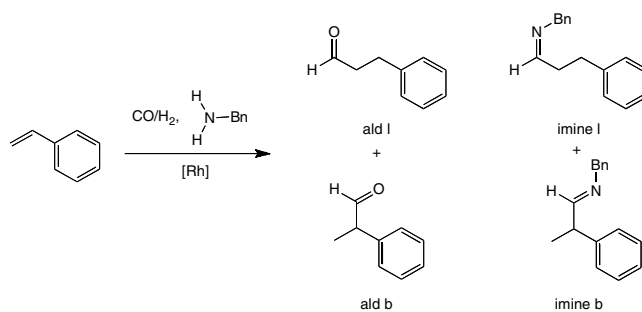

Supplement: c0gc00098a.pdf [file c0gc00098a.pdf]
